# Supplementary material for: Effects of Action Planning After Employee Surveys
Source: Atypon-hosted journal article supplement (doi:10.1027/1866-5888/a000285), 2021-10-20

**Electronic Supplementary Material for  
Huebner, L.-A., & Zacher, H. (2021). Effects of action planning after employee surveys.  
*Journal of Personnel Psychology*. <https://doi.org/10.1027/1866-5888/a000285>**

**Figure E1.** Screeplot of exploratory factor analyses (EFA) performed on the employee survey (n = 300; EFA conducted on all 24 items of employee survey)

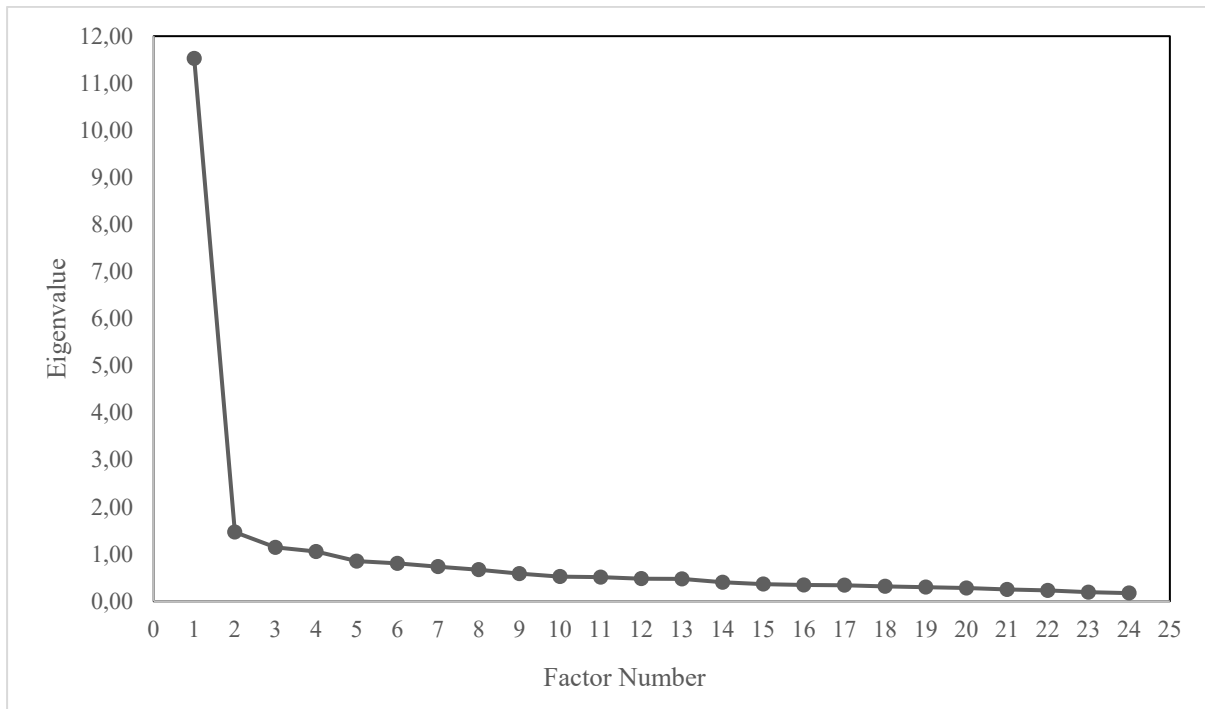

Supplement: 1866-5888_a000285_esm1.pdf [file 1866-5888_a000285_esm1.pdf]
