# Supplementary material for: Effects of Action Planning After Employee Surveys
Source: Atypon-hosted journal article supplement (doi:10.1027/1866-5888/a000285), 2021-10-20
Supplement: 1866-5888_a000285_esm4.pdf [file 1866-5888_a000285_esm4.pdf]

**Electronic Supplementary Material for  
Huebner, L.-A., & Zacher, H. (2021). Effects of action planning after employee surveys.  
*Journal of Personnel Psychology*. <https://doi.org/10.1027/1866-5888/a000285>**

Table E10

*Results from interviews with five managers of organization*

---

Example quotes

---

Manager 1: "When nobody dares to talk in those meetings... well what are you supposed to do. There is nothing I can do. We really need an input box [for the survey] in which we can enter qualitative responses, so we can then talk about it. During the meetings, people just won't talk."

Manager 2: "Honestly, it felt like I could not get through to everyone. I was not able to break the ice and was just was not sure what to do."

Manager 3: "Generally, I think this survey is a great tool, but I must say that it does lead to much additional work for me. Preparing the workshops and everything. I still do it, but it is a lot."

Manager 4: "There are so many topics that are within my responsibility and issues I have to solve and that have to be discussed with the team. Some of them, I cannot solve because my hands are tied, for example superordinate topics, but my team understands this problem."

Manager 5: "It is a lot of work, and there is so little time. It would be great to have some short instructions that tell you how to proceed, for example like a short video with advice, maybe also something I could also show to my team. That would be great."

---

*Note.* We interviewed five managers who repeatedly showed poor employee survey results about their experiences in conducting the employee survey follow-up process with their organizational units (OUs).
